# Supplementary material
Source: Springer Nature journal article supplement (https://www.springermedizin.de/resource/supplementary/12958_2007_418_MOESM2_ESM.pdf/9567836)

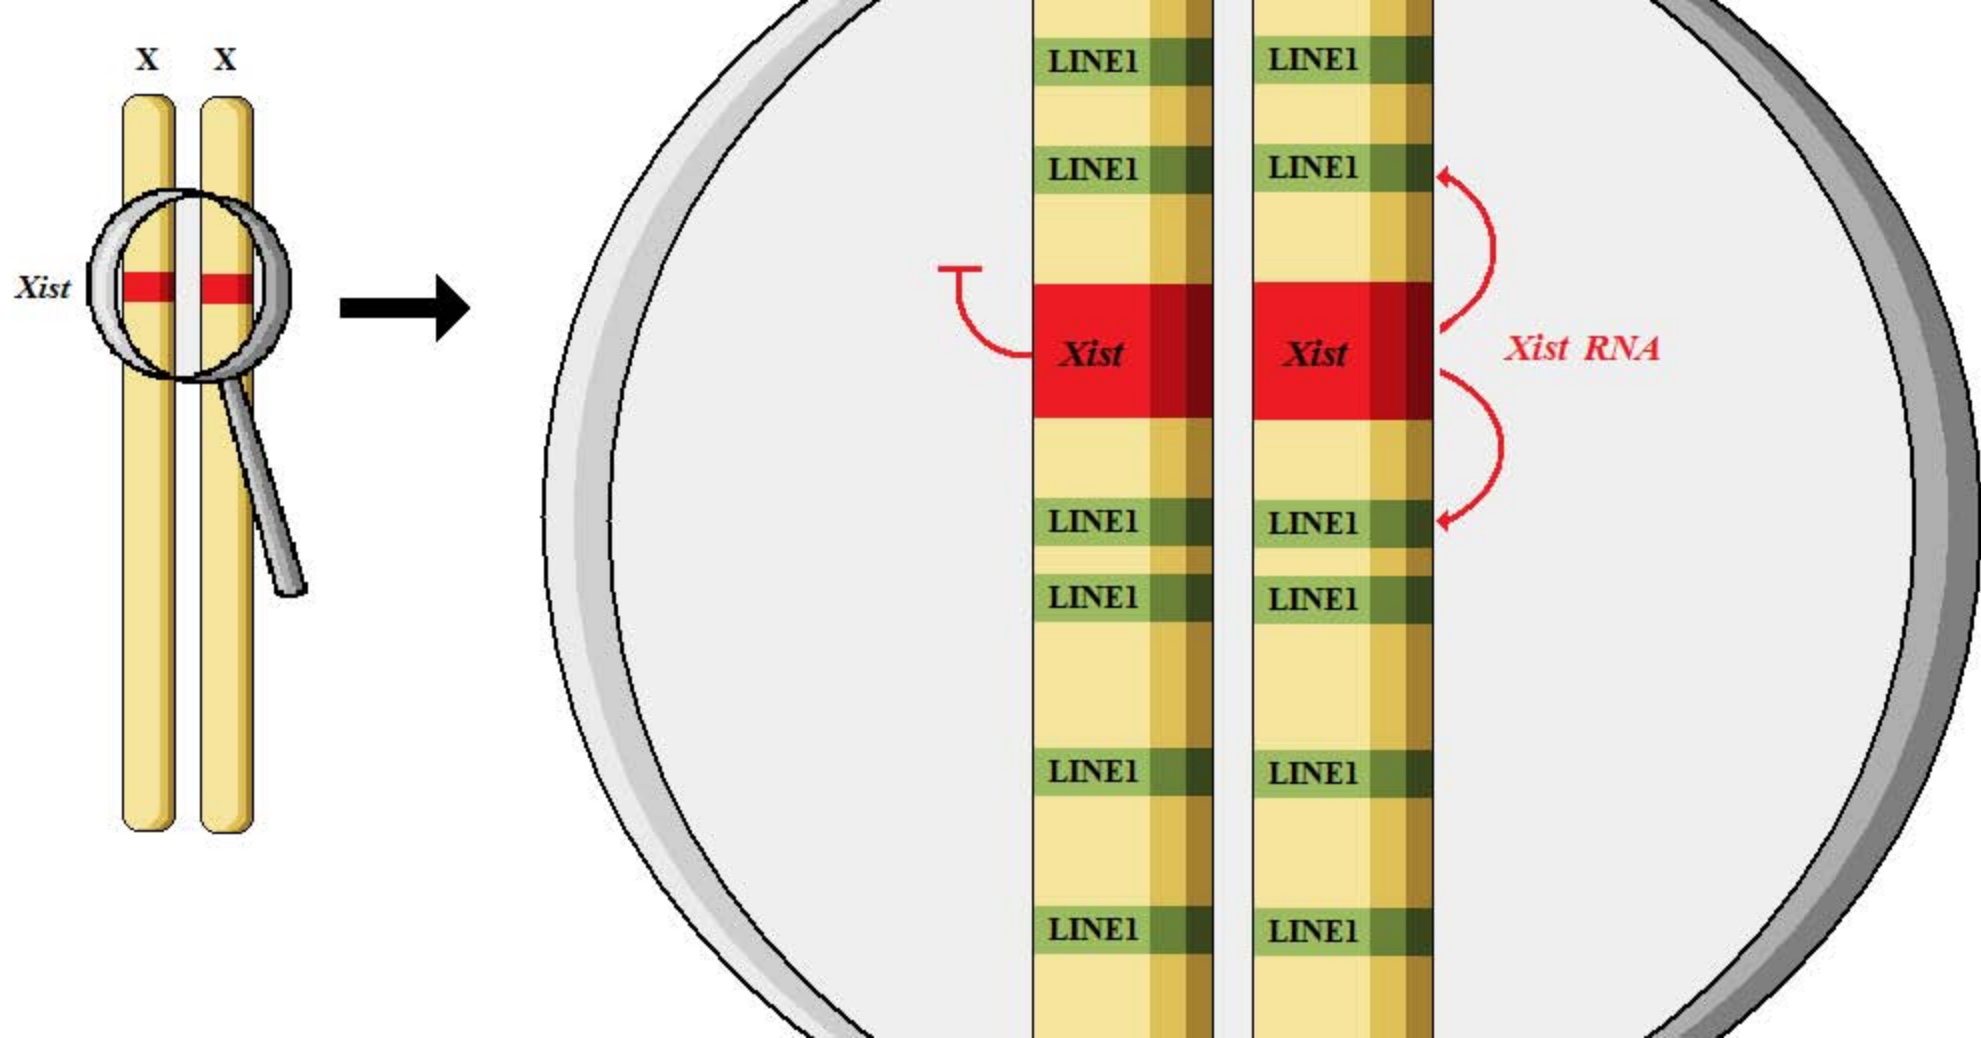

Supplement: MOESM2 [file 9567836]
